# Supplementary material
Source: MDPI journal article supplement (https://www.mdpi.com/2076-3417/13/4/2045)
Supplement: s1 [file s1]

## Supplementary

**Table S1.** GaSe:S refractive index for ordinary wave at the wavelength of 1547 nm.

|                       |                                        |            |                                                                                                                         |                                                                             |               |                |                                                                                  |                                |                                           |
|-----------------------|----------------------------------------|------------|-------------------------------------------------------------------------------------------------------------------------|-----------------------------------------------------------------------------|---------------|----------------|----------------------------------------------------------------------------------|--------------------------------|-------------------------------------------|
|                       | This work                              | Kato       | Allakhverdiev<br>1982                                                                                                   | Abdullaev 1975                                                              | Takaoka       | Vodopya<br>nov | Abdullaev<br>1972                                                                | Allakhver<br>diev 2005         | McMath &<br>Irwin                         |
|                       |                                        | [65]       | [78]                                                                                                                    | [77]                                                                        | [44]          | [45]           | [79]                                                                             | [80]                           | [82]                                      |
| Method of measurement |                                        |            |                                                                                                                         |                                                                             |               |                |                                                                                  |                                |                                           |
|                       | ATR<br>(Metricon)                      |            | Brewster<br>angles and<br>Conoscopic<br>pattern angles<br>(0.63, 1.15, and<br>3.39 $\mu\text{m}$ ); IR<br>interference. | Brewster angles<br>(0.63, 1.15, and<br>3.39 $\mu\text{m}$ ); NLO<br>mixing. | NLO<br>mixing | NLO<br>mixing  | Not stated.<br>Brewster<br>angles<br>(0.63, 1.15,<br>and 3.39<br>$\mu\text{m}$ ) | Minimum<br>deviation<br>method | Minimum<br>deviation; IR<br>interference; |
| Crystal growth method |                                        |            |                                                                                                                         |                                                                             |               |                |                                                                                  |                                |                                           |
|                       | Bridgman                               | Not stated | Not stated                                                                                                              | Bridgman-<br>Strockbarger                                                   | Not<br>stated | Not stated     | Bridgman-<br>Strockbarg<br>er                                                    | Bridgman                       | Bridgman                                  |
| x                     | Refractive index for the ordinary wave |            |                                                                                                                         |                                                                             |               |                |                                                                                  |                                |                                           |

|      |       |       |       |       |      |       |       |      |       |
|------|-------|-------|-------|-------|------|-------|-------|------|-------|
| 0    | 2.75  | 2.758 |       | 2.871 | 2.78 | 2.759 | 2.746 | 2.75 | 2.767 |
| 0.03 | 2.744 | 2.753 |       |       |      |       |       |      |       |
| 0.12 | 2.733 | 2.739 |       |       |      |       |       |      |       |
| 0.16 | 2.713 | 2.733 |       |       |      |       |       |      |       |
| 0.2  |       |       | 2.839 |       |      |       |       |      |       |
| 0.22 | 2.703 | 2.723 |       |       |      |       |       |      |       |
| 0.6  |       |       | 2.723 |       |      |       |       |      |       |
| 0.8  |       |       | 2.626 |       |      |       |       |      |       |
